# Supplementary material for: PIEZO2 in sensory neurons and urothelial cells coordinates urination
Source: Springer Nature journal article supplement (doi:10.1038/s41586-020-2830-7), 2020-10-14
Supplement: 41586_2020_2830_MOESM1_ESM.xlsx [file 41586_2020_2830_MOESM1_ESM.xlsx]

## Sheet: Sheet1
Patient	P1	P2	P3	P4	P5	P6	P7	P8	P9	P10	P11	P12
Age at most recent visit (yrs)	18	9	14	12	15	18	8	43	8	4	31	36
Sex	F	F	M	F	M	M	F	M	F	F	F	F
Ancestry	Bangladeshi	European/Japanese	Spanish	Spanish	Spanish	Turkish	Chilean	Unknown (adopted)	Italian/French	French Canadian	French Moroccan	French Moroccan
Mutations	c.4723C>T, p.R1575*	c.5053C>T, p.R1685*	c.7440+1 G>A, IVS47+1 G>A	c.1278C>G, p.Y426*	c.1084C>T, p.Q362*	c.1384C>T, p.R462*	c.999C>A; p.Y333*	c.2004delG, p.G668*		c.7699A>T, p.Lys2587*	c.3241C>T; p.Arg1051*	c.3241C>T; p.Arg1051*
	c.5053C>T, p.R1685*	c.5053C>T,p.R1685*	c.7730C>A, p.S2577*	c.6005_6006insC, p.H2002fs	c.5053C>T, p.R1685*	c.1384C>T, p.R462*	c.2288G>A; p.W763*	c.2004delG, p.G668*		c.7743-2A>G
UTIs					Yes	Yes			Yes		Yes
Enuresis	Nocturnal enuresis until 12 yo						Ongoing day time and nocturnal incontinence				Noctural enuresis until 9 yo. Episodes of day time incontinence in childhood (some she would not notice until she stood up).
Stress incontinence									Giggle incontinence	Giggle incontinence	Yes	Yes
Voiding frequency			1-2 times a day, max 4 times a day.	2 times a day	2-3 times a day		2-4 times a day	2 times a day, when bladder completely full	1-2 times a day without a schedule	3-4 times a day	2-4 times a day	2 times a day
Urinary urgency		Occasional urinary urgency	No		No		Reports symptoms of urinary urgency (lets mom know after already voided)				Urge incontinence in adolescence. Urgency in childhood.	Yes
Incomplete voiding			Yes					Yes			Yes	Yes
Bladder ultrasound	Normal study. 10.5 x 5-5.5 x 9 cm distended bladder (260 ml volume). Trivial postvoid urinary bladder volume.	Normal bladder appearance. Prevoid 60 cc. Postvoid 15 cc residual urine.	Normal bladder appearance. Minimal-moderate postvoid bladder volume. 12 x 8.5 x 9 cm bladder. 6 x 2.5 x 7.5 cm postvoid bladder	Normal bladder appearance. Moderate postvoid urinary bladder residual volume. 13 x 7 x 11cm prevoid. Postvoid dimensions 7.5 x 4 x 6.5 cm	Normal bladder appearance. Moderate postvoid bladder residual volume. 8.5 x 8 x 9 cm bladder when distended, Post void 5 x 2 x 6 cm size.	Minimal dependent debris. Normal bladder wall thickness. Minimal postvoid residual volume, Nontender, 11 x 8 x 8.5-9 cm bladder. Postvoid 2.5 x 1.5 x 3.3 cm.	Normal bladder appearance. Post void volume within normal limits. Prevoid 219 ml, postvoid 17 ml.	Not done	Normal bladder appearance. No significant postvoid residual. Distended bladder volume 9.8 x 5.4 x 9.7 cm (269ml). Postvoid volume 0.6 x 2 x 2.2 cm (1.4 ml).	Normal bladder appearance. Prevoid volume 2.1 x 6.6 x 4.4 cm (31 ml), postvoid volume 2.2 x 1.9 x 4.8 cm (11ml).		Normal bladder wall. Left ureterovesicular stone with mild ductal ectasia but no dilatation (2011)
Additional Urologic work-up											She underwent several urodynamic studies in her early 20s with a reported normal bladder compliance with a slightly reduced capacity of 300ml, a normotonic and areflexic detrusor, and a hypertonic urinary sphincter (off of medications). Micturition could not be triggered at the time. Subsequent flow studies triggered with percussion showed intermittent urinary flow with flow velocity ranging betw…
Uriologic medications	-	-	-	-	-	-	-	-	-	-	alpha 1 blocking agents off and on in her early twenties, Urostim two years ago	-
Additional notes				Difficulty initiating a stream		He voids once or twice daily and describes sudden urgency whenever he needs to void. His father describes urinary hesitancy. No sensation of incomplete voiding. He had a few UTIs in childhood/early teenage years. His last UTI was about 5 years ago. No kidney stones.		He voids twice per day when his bladder is completely full and has an intermittent stream.	No difficulty initiating stream, feels she empties bladder completely. On a voiding schedule.	Continent of urine, but has been wearing pullups since recent hip surgery	Dysuria, urgency and incomplete voiding in childhood with frequent accidents because she could not get to the bathroom on time and episodes of enuresis, some of which she would not notice until she stood up. In adolescence she had urge incontinence, with laughing for example. She has been on alpha 1 adrenergic blocking agents off and on since her early 20s with some perceived benefit. She underwe…	She voids twice per day, usually in the morning and in the evening. She feels an urge to void which she describes as pelvic discomfort or heaviness. She has difficult emptying her bladder and has to lean forward and push against her lower abdomen with her hands to ensure complete voiding and avoid a small leak when she stands up or having to void again a few hours later.
